# Supplementary material for: Synthesis, structural peculiarities, and photosensitivity of fluorinated dibenzo-1,2,5,6-tetrathiocines
Source: Royal Society of Chemistry journal article supplement (doi:10.1039/d4nj02284j), 2024-01-01
Supplement: d4nj02284j1.pdf [file d4nj02284j1.pdf]

## Supporting Information

# Synthesis, structural peculiarities, and photosensitivity of fluorinated dibenzo-1,2,5,6-tetrathiocines†

Alexander A. Buravlev, Alexander Yu. Makarov, Georgy E. Salnikov, Alexander M. Genaev, Irina Yu. Bagryanskaya, Pavel V. Nikulshin, Vyacheslav E. Platonov, and Andrey V. Zibarev

## Contents

### 1. X-ray diffraction

#### 1.1. XRD and DFT molecular geometries

#### 1.2. Crystal packing

### 2. Spectral calculations

#### 2.1. NMR spectra

#### 2.2. UV-Vis spectra

#### 2.3. IR spectra

### 3. Quantum chemical calculations for conformational analysis

#### 3.1. Selection of computational method

#### 3.2. *Twist* → *twist* and *chair* → *twist* kinetics

#### 3.3. Other calculations

### 4. Kinetics evaluation

#### 4.1. Analysis of IRC trajectories

#### 4.2. Equilibrium *chair* ↔ *twist*

### 5. References

## 1. X-ray diffraction

### 1.1. XRD and DFT molecular geometries

**Table S1.** Crystallographic data for compounds

| Compound                                           | 1                                                            | 2                                                             |
|----------------------------------------------------|--------------------------------------------------------------|---------------------------------------------------------------|
| Empirical formula                                  | C <sub>12</sub> H <sub>4</sub> F <sub>4</sub> S <sub>4</sub> | C <sub>18</sub> F <sub>16</sub> S <sub>4</sub>                |
| Formula weight                                     | 352.39                                                       | 648.42                                                        |
| Temperature K                                      | 296(2)                                                       | 200(2)                                                        |
| Wavelength Å                                       | 0.71073                                                      | 0.71073                                                       |
| Crystal system                                     | Monoclinic                                                   | Monoclinic                                                    |
| Space group                                        | P2 <sub>1</sub> /c                                           | C2/c                                                          |
| Unit cell dimensions <i>a</i> Å                    | 4.7996(11)                                                   | 16.0085(7)                                                    |
| <i>b</i> Å                                         | 11.340(3)                                                    | 11.8439(4)                                                    |
| <i>c</i> Å                                         | 12.006(3)                                                    | 10.6197(4)                                                    |
| $\alpha$ °                                         | 90                                                           | 90                                                            |
| $\beta$ °                                          | 90.465(9)                                                    | 91.983(2)                                                     |
| $\gamma$ °                                         | 90                                                           | 90                                                            |
| Volume Å <sup>3</sup>                              | 653.4(3)                                                     | 2012.32(13)                                                   |
| <i>Z</i>                                           | 2                                                            | 4                                                             |
| Density (calcd.) Mg m <sup>-3</sup>                | 1.791                                                        | 2.140                                                         |
| Abs. coefficient mm <sup>-1</sup>                  | 0.757                                                        | 0.628                                                         |
| F(000)                                             | 352                                                          | 1264                                                          |
| Crystal size mm <sup>3</sup>                       | 0.06 × 0.06 × 0.80                                           | 0.20 × 0.20 × 0.40                                            |
| $\Theta$ range for data collection °               | 3.39-25.12                                                   | 2.14-26.04                                                    |
| Index ranges                                       | -5 ≤ <i>h</i> ≤ 5, -13 ≤ <i>k</i> ≤ 13, -14 ≤ <i>l</i> ≤ 14  | -19 ≤ <i>h</i> ≤ 19, -14 ≤ <i>k</i> ≤ 14, -13 ≤ <i>l</i> ≤ 11 |
| Reflections collected                              | 6275                                                         | 12137                                                         |
| Independent reflections                            | 1164 R(int) = 0.065                                          | 1989 R(int) = 0.051                                           |
| Completeness to $\theta$ %                         | 99.2                                                         | 99.9                                                          |
| Data / restraints / parameters                     | 1164 / 0 / 91                                                | 1989 / 0 / 172                                                |
| Goodness-of-fit on <i>F</i> <sup>2</sup>           | 1.04                                                         | 1.05                                                          |
| Final R indices <i>I</i> > 2 $\sigma$ ( <i>I</i> ) | R <sub>1</sub> = 0.0483, wR <sub>2</sub> = 0.1361            | R <sub>1</sub> = 0.0333, wR <sub>2</sub> = 0.0820             |

|                                              |                                  |                                  |
|----------------------------------------------|----------------------------------|----------------------------------|
| Final R indices (all data)                   | $R_1 = 0.0821$ , $wR_2 = 0.1591$ | $R_1 = 0.0393$ , $wR_2 = 0.0865$ |
| Largest diff. peak/hole $e \text{ \AA}^{-3}$ | 0.36 / -0.26                     | 0.51 / -0.34                     |
| CCDC                                         | <b>2347751</b>                   | <b>2347752</b>                   |

**Table S1** (continued). Crystallographic data for compounds

| Compound                                    | <b>17</b>                                                        | <b>7</b>                                                           |
|---------------------------------------------|------------------------------------------------------------------|--------------------------------------------------------------------|
| Empirical formula                           | $C_{12}H_4F_4S_4$                                                | $C_{23}H_{14}F_8S_2$                                               |
| Formula weight                              | 352.39                                                           | 506.46                                                             |
| Temperature K                               | 296(2)                                                           | 200(2)                                                             |
| Wavelength $\text{\AA}$                     | 0.71073                                                          | 0.71073                                                            |
| Crystal system                              | Monoclinic                                                       | Triclinic                                                          |
| Space group                                 | $P2_1/c$                                                         | $P-1$                                                              |
| Unit cell dimensions $a \text{ \AA}$        | 4.4346(4)                                                        | 9.0063(5)                                                          |
| $b \text{ \AA}$                             | 29.235(3)                                                        | 9.1070(5)                                                          |
| $c \text{ \AA}$                             | 10.3338(11)                                                      | 13.7547(7)                                                         |
| $\alpha^\circ$                              | 90                                                               | 101.990(2)                                                         |
| $\beta^\circ$                               | 100.540(4)                                                       | 101.874(2)                                                         |
| $\gamma^\circ$                              | 90                                                               | 93.494(2)                                                          |
| Volume $\text{\AA}^3$                       | 1317.1(2)                                                        | 1073.59(10)                                                        |
| $Z$                                         | 4                                                                | 2                                                                  |
| Density (calcd.) $\text{Mg m}^{-3}$         | 1.777                                                            | 1.567                                                              |
| Abs. coefficient $\text{mm}^{-1}$           | 0.751                                                            | 0.326                                                              |
| $F(000)$                                    | 704                                                              | 512                                                                |
| Crystal size $\text{mm}^3$                  | $0.10 \times 0.20 \times 0.80$                                   | $0.40 \times 0.50 \times 0.80$                                     |
| $\Theta$ range for data collection $^\circ$ | 2.9-27.6                                                         | 3.05 – 26.20                                                       |
| Index ranges                                | $-5 \leq h \leq 4$ , $-37 \leq k \leq 38$ , $-13 \leq l \leq 13$ | $-19 \leq h \leq 19$ , $-14 \leq k \leq 14$ , $-13 \leq l \leq 11$ |
| Reflections collected                       | 13123                                                            | 11516                                                              |
| Independent reflections                     | 3042 $R(\text{int}) = 0.052$                                     | 4246 $R(\text{int}) = 0.051$                                       |
| Completeness to $\theta$ %                  | 99.8                                                             | 99.6                                                               |
| Data / restraints / parameters              | 3042 / 0 / 181                                                   | 4246 / 0 / 298                                                     |
| Goodness-of-fit on $F^2$                    | 1.02                                                             | 1.02                                                               |
| Final R indices $I > 2\sigma(I)$            | $R_1 = 0.0410$ , $wR_2 = 0.0905$                                 | $R_1 = 0.0476$ , $wR_2 = 0.1257$                                   |
| Final R indices (all data)                  | $R_1 = 0.0580$ , $wR_2 = 0.0985$                                 | $R_1 = 0.0618$ , $wR_2 = 0.1372$                                   |

Largest diff. peak/hole e Å<sup>-3</sup> 0.30 / -0.21

0.36 / -0.24

CCDC

2351030

2351029

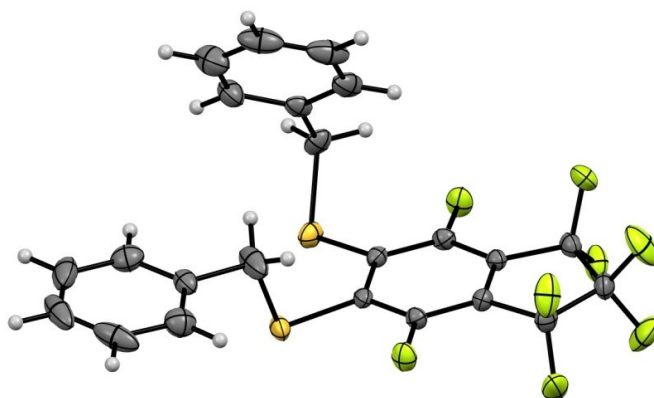

**Figure S1** XRD molecular structure of **7** (CCDC 2351029) shown in thermal displacement ellipsoids of 30% probability. Colour code: C – grey, H – light grey, F – green, S – orange.

**Table S2.** Fully-optimized B3LYP/DKH-def2-qzvpp and XRD molecular geometry of compound **1**

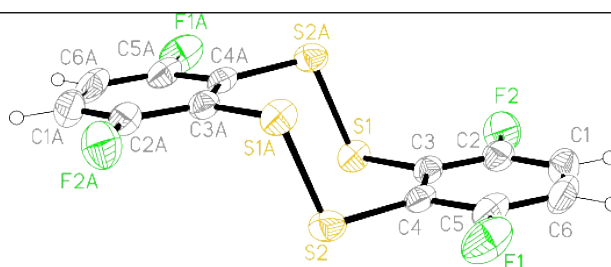

| Bond    | Bond length, Å |        | Bond angle    | Angle value, ° |        |
|---------|----------------|--------|---------------|----------------|--------|
|         | DFT            | XRD    |               | DFT            | XRD    |
| C1–C2   | 1.383          | 1.3623 | C8–C7–S3      | 123.49         | 123.30 |
| C1–C3   | 1.385          | 1.357  | C7–S3–S1      | 103.22         | 103.29 |
| C1–H1   | 1.080          | –      | S3–S1–C5      | 103.21         | 102.83 |
| C10–C12 | 1.385          | 1.357  | S1–C5–C6      | 123.49         | 122.47 |
| C10–F4  | 1.342          | 1.352  | C5–C6–S2      | 123.49         | 123.30 |
| C11–C12 | 1.383          | 1.363  | C6–S2–S4      | 103.22         | 103.29 |
| C11–H3  | 1.080          | –      | S2–S4–C8      | 103.21         | 102.83 |
| C12–H4  | 1.080          | –      | S4–C8–C7      | 123.49         | 122.47 |
| C2–C4   | 1.385          | 1.365  | Torsion angle | Angle value, ° |        |
| C2–H2   | 1.080          | –      | C8–C7–S3–S1   | 81.09          | 82.85  |

|        |       |       |             |         |         |
|--------|-------|-------|-------------|---------|---------|
| C3–C5  | 1.393 | 1.386 | C7–S3–S1–C5 | –110.94 | –112.24 |
| C3–F1  | 1.342 | 1.352 | S3–S1–C5–C6 | 81.02   | 79.91   |
| C4–C6  | 1.393 | 1.393 | S1–C5–C6–S2 | 0.03    | 1.21    |
| C4–F2  | 1.342 | 1.345 | C5–C6–S2–S4 | –81.09  | –82.85  |
| C5–C6  | 1.411 | 1.408 | C6–S2–S4–C8 | 110.94  | 112.24  |
| C5–S1  | 1.773 | 1.768 | S2–S4–C8–C7 | –81.02  | –79.91  |
| C6–S2  | 1.773 | 1.760 | S4–C8–C7–S3 | –0.03   | –1.21   |
| C7–C8  | 1.411 | 1.408 |             |         |         |
| C7–C9  | 1.393 | 1.393 |             |         |         |
| C7–S3  | 1.773 | 1.760 |             |         |         |
| C8–C10 | 1.393 | 1.386 |             |         |         |
| C8–S4  | 1.773 | 1.768 |             |         |         |
| C9–C11 | 1.385 | 1.365 |             |         |         |
| C9–F3  | 1.342 | 1.345 |             |         |         |
| S1–S3  | 2.079 | 2.057 |             |         |         |
| S2–S4  | 2.079 | 2.057 |             |         |         |

**Table S3.** Fully-optimized B3LYP/DKH-def2-qzvpp and XRD molecular geometry of compound **2**

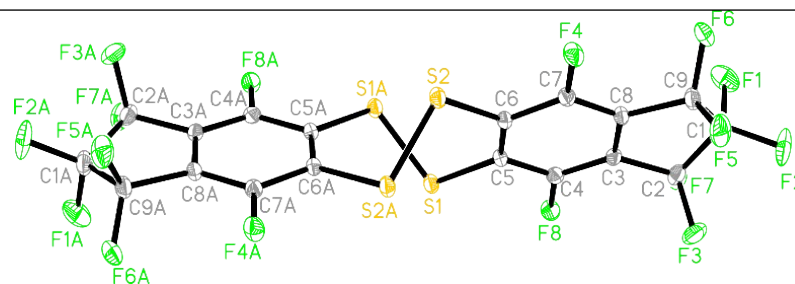

| Bond    | Bond length, Å |       | Bond angle, ° | Angle value, ° |        |
|---------|----------------|-------|---------------|----------------|--------|
|         | DFT            | XRD   |               | DFT            | XRD    |
| C1–C2   | 1.568          | 1.534 | C11–C10–S3    | 126.21         | 126.27 |
| C1–C3   | 1.568          | 1.544 | C10–S3–S2     | 103.46         | 101.95 |
| C1–F1   | 1.340          | 1.327 | S3–S2–C9      | 103.58         | 101.95 |
| C1–F2   | 1.349          | 1.354 | S2–C9–C8      | 126.27         | 126.27 |
| C10–C11 | 1.412          | 1.397 | C9–C8–S1      | 126.21         | 125.94 |
| C10–C12 | 1.398          | 1.768 | C8–S1–S4      | 103.39         | 103.14 |
| C10–S3  | 1.769          | 1.416 | S1–S4–C11     | 103.53         | 103.14 |
| C11–C13 | 1.398          | 1.393 | S4–C11–C10    | 126.29         | 125.94 |

---

|         |       |       |               |                |        |
|---------|-------|-------|---------------|----------------|--------|
| C11–S4  | 1.769 | 1.771 | C11–C10–S3    | 126.21         | 126.27 |
| C12–C14 | 1.377 | 1.369 | Torsion angle | Angle value, ° |        |
| C12–F9  | 1.337 | 1.343 | C11–C10–S3–S2 | –45.02         | –44.01 |
| C13–C15 | 1.377 | 1.369 | C10–C11–S4–S1 | –44.75         | –42.57 |
| C13–F10 | 1.337 | 1.347 | C8–C9–S2–S3   | –44.86         | –44.01 |
| C14–C15 | 1.391 | 1.388 | C9–C8–S1–S4   | –45.28         | –42.57 |
| C14–C16 | 1.499 | 1.499 | C10–S3–S2–C9  | 114.71         | 115.78 |
| C15–C17 | 1.500 | 1.506 | C8–S1–S4–C11  | 114.82         | 113.44 |
| C16–C18 | 1.568 | 1.544 | C11–C10–C9–C8 | 60.18          | 63.69  |
| C16–F11 | 1.351 | 1.359 |               |                |        |
| C16–F12 | 1.362 | 1.335 |               |                |        |
| C17–C18 | 1.568 | 1.534 |               |                |        |
| C17–F13 | 1.351 | 1.362 |               |                |        |
| C17–F14 | 1.362 | 1.339 |               |                |        |
| C18–F15 | 1.349 | 1.354 |               |                |        |
| C18–F16 | 1.340 | 1.327 |               |                |        |
| C2–C4   | 1.499 | 1.506 |               |                |        |
| C2–F3   | 1.362 | 1.339 |               |                |        |
| C2–F4   | 1.351 | 1.362 |               |                |        |
| C3–C5   | 1.499 | 1.499 |               |                |        |
| C3–F5   | 1.362 | 1.335 |               |                |        |
| C3–F6   | 1.351 | 1.359 |               |                |        |
| C4–C5   | 1.392 | 1.388 |               |                |        |
| C4–C6   | 1.377 | 1.369 |               |                |        |
| C5–C7   | 1.377 | 1.369 |               |                |        |
| C6–C8   | 1.398 | 1.393 |               |                |        |
| C6–F7   | 1.337 | 1.347 |               |                |        |
| C7–C9   | 1.398 | 1.397 |               |                |        |
| C7–F8   | 1.337 | 1.343 |               |                |        |
| C8–S1   | 1.769 | 1.771 |               |                |        |
| C8–C9   | 1.412 | 1.416 |               |                |        |
| C9–S2   | 1.769 | 1.768 |               |                |        |
| S1–S4   | 2.056 | 2.044 |               |                |        |
| S2–S3   | 2.057 | 2.036 |               |                |        |

---

## 1.2. Crystal packing

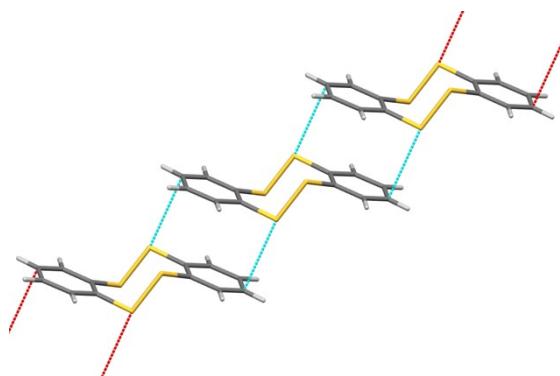

4, C...S shortened contacts in the presence of  $\pi$ -stacking interactions

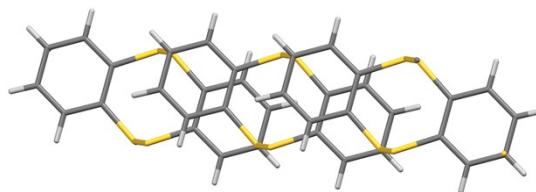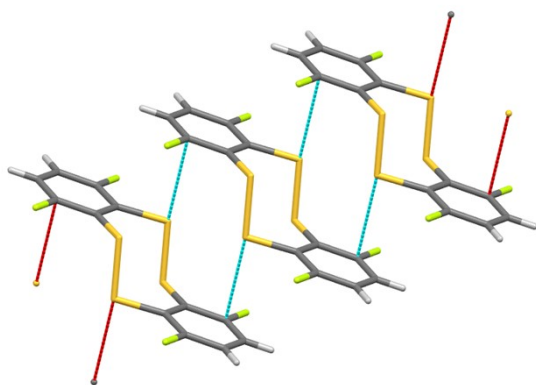

1, C...S shortened contacts in the absence of  $\pi$ -stacking interactions

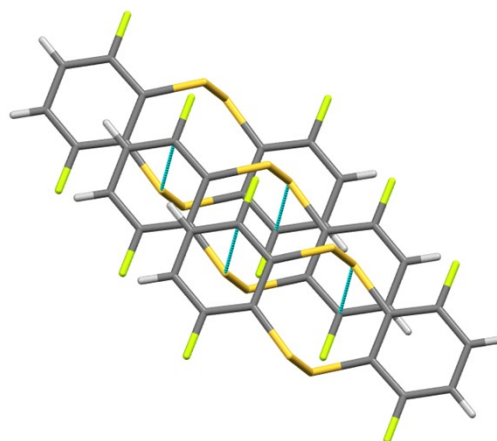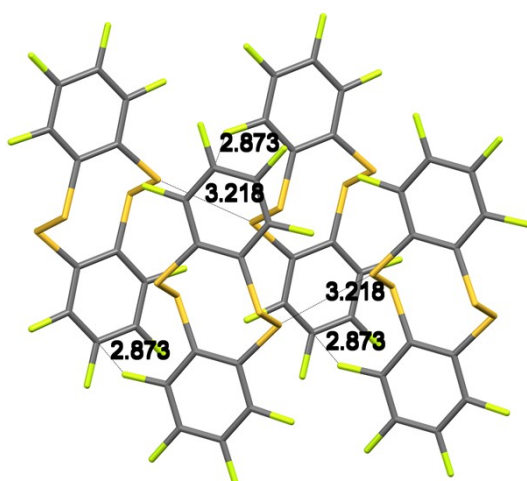

$\alpha$ -5, shortened intermolecular contacts

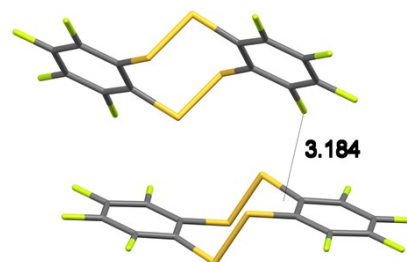

$\alpha$ -5, F... $\pi$  interactions

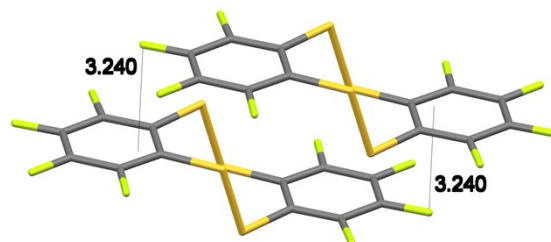

$\beta$ -5, F... $\pi$  interactions

**Figure S2** Fragments of crystal packing of **1**, **4**,<sup>S1</sup> and **5**.<sup>S2</sup>

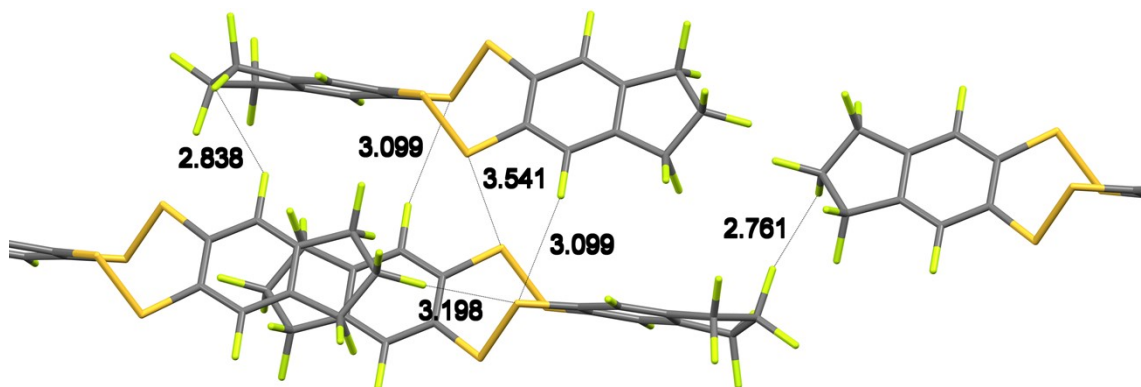

**Figure S3** Fragments of crystal packing of **2** featuring shortened intermolecular contacts / SBIs.

## 2. Spectral calculations

### 2.1. NMR spectra

According to the DFT calculations with CPCM solvent corrections, both  $\delta^1\text{H}$  and  $\delta^{19}\text{F}$  of the *chair* conformer of **1** are downfield relative to those of the *twist* conformer (Table S4). At the BP86/def2-tzvpp level of theory, the *twist* conformer is more stable than the *chair* conformer by  $\sim 4.67$  kJ mol $^{-1}$ . At 296 K in CDCl $_3$  solution, in  $^{19}\text{F}$  NMR spectra the ratio of the conformers is 1:1.3, and in  $^1\text{H}$  NMR spectra 1:1.2, in favor of the *twist* one; for the  $^1\text{H}$  NMR data, accuracy is reduced because of overlapping of the signal of residual H atoms of CDCl $_3$  with the signal of the *chair* conformer.



**Table S4.** Experimental and DFT-calculated chemical shifts ( $\delta$ , ppm) of compound **1** for solutions in  $\text{CDCl}_3$

|              |        | $\delta^{19}\text{F}^a$ |             |            |                |          |          |          |
|--------------|--------|-------------------------|-------------|------------|----------------|----------|----------|----------|
| Conformer    | exp.   | B3LYP                   |             |            |                |          | wB97X-V  |          |
|              |        | def2-tzvpp              | def2-tzvppd | def2-qzvpp | DKH-def2-qzvpp | pcSseg-3 | IGLO-III | IGLO-III |
| <i>chair</i> | -104.2 | -98.8                   | -100.6      | -99.6      | -99.5          | -99.4    | -100.4   | -105.5   |
| <i>twist</i> | -110.4 | -105.7                  | -107.9      | -106.9     | -106.8         | -107.8   | -108     | -112.9   |
|              |        | PBE0                    |             |            |                |          |          |          |
| Conformer    | exp.   | DKH-def2-qzvpp          |             |            |                |          | IGLO-III |          |
|              |        | def2-tzvpp              | def2-tzvppd | def2-qzvpp | DKH-def2-qzvpp | pcSseg-3 | IGLO-III | IGLO-III |
| <i>chair</i> | -104.2 |                         |             |            |                | -98.3    |          | -101.8   |
| <i>twist</i> | -110.4 |                         |             |            |                | -105.7   |          | -109.6   |
|              |        | $\delta^1\text{H}^b$    |             |            |                |          |          |          |
| Conformer    | exp.   | B3LYP                   |             |            |                |          | wB97X-V  |          |
|              |        | def2-tzvpp              | def2-tzvppd | def2-qzvpp | DKH-def2-qzvpp | pcSseg-3 | IGLO-III | IGLO-III |
| <i>chair</i> | 7.21   | 7.65                    |             | 7.65       | 7.65           | 7.68     | 7.63     | 7.99     |
| <i>twist</i> | 7.00   | 7.44                    |             | 7.42       | 7.43           | 7.43     | 7.42     | 7.79     |
|              |        | PBE0                    |             |            |                |          |          |          |
| Conformer    | exp.   | DKH-def2-qzvpp          |             |            |                |          | IGLO-III |          |
|              |        | def2-tzvpp              | def2-tzvppd | def2-qzvpp | DKH-def2-qzvpp | pcSseg-3 | IGLO-III | IGLO-III |
| <i>chair</i> | 7.21   |                         |             |            | 7.71           |          | 7.67     |          |
| <i>twist</i> | 7.00   |                         |             |            | 7.47           |          | 7.45     |          |
|              |        | $\delta^{13}\text{C}^b$ |             |            |                |          |          |          |
| Conformer    | exp.   | PBE0                    |             |            |                |          |          |          |
|              |        | def2-tzvpp              | def2-tzvppd | def2-qzvpp | IGLO-III       | pcSseg-3 |          |          |
| <i>chair</i> | C-H    | 119.3                   |             | 120.5      | 120.1          | 120.1    |          |          |
|              | C-F    | 158.8                   |             | 162.2      | 161.9          | 162.0    |          |          |
|              | C-S    | - <sup>c</sup>          |             | 132.2      | 132.4          | 131.9    |          |          |
| <i>twist</i> | C-H    | 114.1                   |             | 114.5      | 114.0          | 113.9    |          |          |
|              | C-F    | 157.2                   |             | 160.3      | 160.0          | 160.2    |          |          |
|              | C-S    | - <sup>c</sup>          |             | 124.6      | 124.7          | 124.2    |          |          |

<sup>a</sup> Relative to  $\text{CFCl}_3$ . <sup>b</sup> Relative to TMS. <sup>c</sup> Not detected due to low intensity.

According to the DFT calculations for compound **2** with CPCM solvent corrections (Table S5), the signal with  $\delta^{19}\text{F} = -103.9$ , as well as the two AB systems formed by pairs of signals with  $\delta^{19}\text{F} = -107.3$  and  $-108.2$  ( $J_{AB}^{exp} = 268$ ,  $J_{AB}^{PBE0/pcJ-3} = 247$  Hz), and  $-128.6$  and  $-129.5$  ( $J_{AB}^{exp} = 242$ ,  $J_{AB}^{PBE0/pcJ-3} = 210$  Hz), belong to the *chair* conformation. The signal with  $\delta^{19}\text{F} = -109.1$ , the AB system formed by the signals with  $\delta^{19}\text{F} = -106.8$  and  $-107.4$  ( $J_{AB}^{exp} = 268$ ,  $J_{AB}^{PBE0/pcJ-3} = 240$  Hz), and the singlet with  $\delta^{19}\text{F} = -129.1$  belong to the *twist* conformation. The calculations confirm that in toluene AB systems for both conformations are possible at the  $\alpha$ - $\text{CF}_2$  groups, and only for the *chair* conformation at the  $\beta$ - $\text{CF}_2$  groups. At the PBE0/def2-tzvpp level of theory, the *twist* conformer is more stable than the *chair* conformer by  $\sim 8.68$  kJ mol<sup>-1</sup>. At 296 K, experimental ratio of the conformers is 1:7.1 in favor of the *twist* one.

**Table S5.** Experimental and DFT-calculated chemical shifts of compound **2** in toluene ( $-\delta^{19}\text{F}$ , ppm; relative to  $\text{CFCl}_3$ )

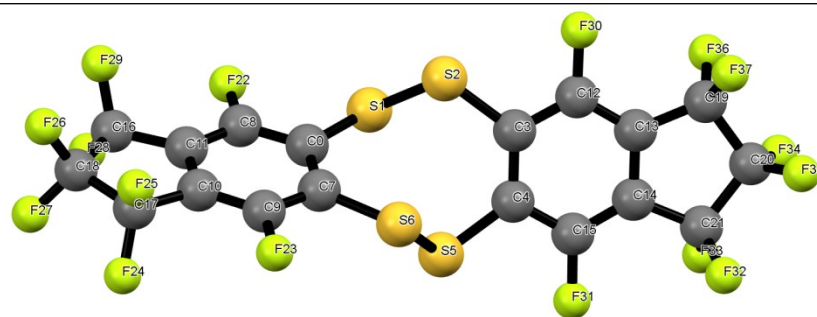

$-\delta^{19}\text{F}$

| Atom | experiment   |              | B3LYP        |              |              |              |              |              |
|------|--------------|--------------|--------------|--------------|--------------|--------------|--------------|--------------|
|      |              |              | def2-tzvpp   |              | IGLO-III     |              | pcSseg-2     |              |
|      | <i>chair</i> | <i>twist</i> | <i>chair</i> | <i>twist</i> | <i>chair</i> | <i>twist</i> | <i>chair</i> | <i>twist</i> |
| F22  | 103.9        | 109.1        | 110.9        | 117.4        | 113.0        | 120.5        | 112.4        | 119.1        |
| F23  | 103.9        | 109.1        | 110.8        | 117.4        | 113.0        | 120.4        | 112.5        | 119.1        |
| F30  | 103.9        | 109.1        | 110.8        | 117.4        | 113.0        | 120.4        | 112.4        | 119.1        |
| F31  | 103.9        | 109.1        | 110.9        | 117.4        | 113.0        | 120.5        | 112.4        | 119.1        |
| F24  | 107.3        | 106.8        | 115.8        | 113.9        | 116.4        | 115.1        | 118.1        | 116.3        |
| F28  | 107.3        | 106.8        | 115.7        | 113.9        | 116.3        | 115.1        | 118.0        | 116.3        |
| F32  | 107.3        | 106.8        | 116.1        | 113.9        | 116.8        | 115.1        | 118.5        | 116.3        |
| F37  | 107.3        | 106.7        | 116.2        | 113.9        | 117.1        | 115.1        | 118.7        | 116.3        |
| F25  | 108.2        | 107.4        | 116.3        | 116.2        | 117.1        | 117.4        | 118.7        | 118.8        |
| F29  | 108.2        | 107.4        | 116.0        | 116.2        | 116.9        | 117.4        | 118.6        | 118.8        |
| F33  | 108.2        | 107.4        | 116.5        | 116.2        | 117.4        | 117.4        | 119.0        | 118.8        |
| F36  | 108.2        | 107.5        | 116.5        | 116.2        | 117.4        | 117.4        | 119.1        | 118.8        |
| F26  | 128.6        | 129.1        | 136.9        | 136.4        | 136.6        | 136.8        | 138.5        | 138.2        |
| F34  | 128.6        | -129.1       | 136.7        | 136.4        | 136.6        | 136.8        | 138.5        | 138.2        |
| F27  | 129.5        | -129.1       | 136.8        | 136.4        | 136.8        | 136.8        | 138.7        | 138.2        |
| F35  | 129.5        | -129.1       | 136.9        | 136.4        | 136.8        | 136.8        | 138.7        | 138.2        |
|      | experiment   |              | PBE0         |              |              |              |              |              |
|      |              |              | def2-tzvpp   |              | IGLO-III     |              | pcSseg-2     |              |
|      | <i>chair</i> | <i>twist</i> | <i>chair</i> | <i>twist</i> | <i>chair</i> | <i>twist</i> | <i>chair</i> | <i>twist</i> |
| F22  | 103.9        | 109.1        | 101.9        | 108.9        | 104.3        | 112.1        | 102.6        | 109.7        |
| F23  | 103.9        | 109.1        | 102.2        | 108.9        | 104.8        | 112.0        | 103.1        | 109.7        |
| F30  | 103.9        | 109.1        | 101.7        | 108.9        | 104.3        | 112.1        | 102.6        | 109.7        |
| F31  | 103.9        | 109.1        | 102.3        | 108.9        | 104.8        | 112.1        | 103.0        | 109.7        |
| F24  | 107.3        | 106.8        | 111.3        | 109.6        | 112.7        | 111.2        | 113.2        | 111.6        |

|     |              |              |              |              |              |              |              |              |
|-----|--------------|--------------|--------------|--------------|--------------|--------------|--------------|--------------|
| F28 | 107.3        | 106.8        | 111.2        | 109.6        | 112.7        | 111.2        | 113.2        | 111.6        |
| F32 | 107.3        | 106.8        | 111.8        | 109.6        | 113.4        | 111.2        | 113.9        | 111.6        |
| F37 | 107.3        | 106.8        | 111.6        | 109.6        | 113.4        | 111.2        | 113.8        | 111.6        |
| F25 | 108.2        | 107.4        | 111.8        | 112.2        | 113.6        | 113.8        | 114.0        | 114.4        |
| F29 | 108.2        | 107.4        | 111.8        | 112.2        | 113.6        | 113.8        | 114.0        | 114.4        |
| F33 | 108.2        | 107.4        | 112.3        | 112.2        | 114.2        | 113.8        | 114.6        | 114.4        |
| F36 | 108.1        | 107.5        | 112.2        | 112.2        | 114.0        | 113.8        | 114.5        | 114.4        |
| F26 | 128.6        | 129.1        | 132.2        | 131.9        | 133.0        | 132.8        | 133.6        | 133.4        |
| F34 | 128.6        | 129.1        | 132.0        | 131.9        | 132.8        | 132.8        | 133.5        | 133.4        |
| F27 | 129.5        | 129.1        | 132.3        | 131.9        | 133.1        | 132.8        | 133.8        | 133.4        |
| F35 | 129.5        | 129.1        | 132.2        | 131.9        | 133.1        | 132.8        | 133.8        | 133.4        |
|     | experiment   |              |              |              | wB97M-V      |              |              |              |
|     |              |              | def2-tzvpp   |              | IGLO-III     |              | pcSseg-2     |              |
|     | <i>chair</i> | <i>twist</i> | <i>chair</i> | <i>twist</i> | <i>chair</i> | <i>twist</i> | <i>chair</i> | <i>twist</i> |
| F22 | 103.9        | 109.1        | 88.5         | 95.1         | 96.4         | 103.3        | 94.7         | 100.9        |
| F23 | 103.9        | 109.1        | 87.8         | 95.1         | 95.8         | 103.3        | 94.1         | 100.9        |
| F30 | 103.9        | 109.1        | 88.5         | 95.1         | 96.5         | 103.3        | 94.7         | 100.9        |
| F31 | 103.9        | 109.1        | 87.9         | 95.1         | 95.8         | 103.3        | 94.1         | 100.9        |
| F24 | 107.3        | 106.8        | 90.1         | 87.8         | 94.0         | 91.9         | 94.3         | 92.2         |
| F28 | 107.3        | 106.8        | 90.1         | 87.8         | 93.9         | 92.8         | 94.2         | 92.2         |
| F32 | 107.3        | 106.8        | 89.6         | 87.8         | 93.8         | 91.9         | 94.2         | 92.2         |
| F37 | 107.3        | 106.7        | 89.9         | 87.8         | 94.2         | 91.9         | 94.4         | 92.2         |
| F25 | 108.2        | 107.4        | 89.9         | 89.4         | 94.2         | 93.5         | 94.4         | 93.8         |
| F29 | 108.2        | 107.4        | 89.4         | 89.4         | 93.8         | 93.5         | 94.2         | 93.9         |
| F33 | 108.2        | 107.4        | 89.5         | 89.4         | 93.9         | 93.5         | 94.3         | 94.0         |
| F36 | 108.2        | 107.5        | 89.5         | 89.4         | 93.9         | 93.5         | 94.3         | 94.0         |
| F26 | 128.6        | 129.1        | 109.6        | 108.9        | 113.0        | 112.5        | 113.6        | 112.9        |
| F34 | 128.6        | 129.1        | 109.6        | 108.9        | 112.9        | 112.5        | 113.5        | 112.9        |
| F27 | 129.5        | 129.1        | 109.3        | 108.9        | 113.0        | 112.5        | 113.5        | 112.9        |
| F35 | -33.4        | -33.8        | -53.5        | -54.0        | -49.8        | -50.4        | -49.3        | -50.0        |

According to the DFT calculations with CPCM corrections on compound **5** (Table S6), the signals with  $\delta^{19}\text{F} = -123.1$  and  $-148.5$  ppm correspond to the *chair* conformation; while those with  $\delta^{19}\text{F} = -131.3$  and  $-155.5$ , to the *twist* conformation. At the PBE0/def2-tzvpp level of theory with CPCM corrections for  $\text{CHCl}_3$  solvent, the *chair* conformer is more stable than the *twist* conformer by  $4.83 \text{ kJ mol}^{-1}$ ; and the experimental ratio of the conformers at 296 K approximately is  $\sim 1:5$  in favor of the *chair* conformer.

**Table S6.** Experimental and DFT-calculated chemical shifts of compound **5** in chloroform ( $-\delta^{19}\text{F}$ , ppm; relative to  $\text{CFCl}_3$ )

| Atom                  | $-\delta^{19}\text{F}$ |              |              |              |              |              |              |              |
|-----------------------|------------------------|--------------|--------------|--------------|--------------|--------------|--------------|--------------|
|                       | Experiment             |              | PBE0         |              |              |              |              |              |
|                       | <i>chair</i>           | <i>twist</i> | def2-tzvpp   |              | IGLO-III     |              | pcSseg-2     |              |
|                       | <i>chair</i>           | <i>twist</i> | <i>chair</i> | <i>twist</i> | <i>chair</i> | <i>twist</i> | <i>chair</i> | <i>twist</i> |
| F <sup>1,4,7,10</sup> | 123.1                  | 131.3        | 119.3        | 128.7        | 119.9        | 130.1        | 118.6        | 127.9        |
| F <sup>2,3,8,9</sup>  | 148.5                  | 155.5        | 146.5        | 155.5        | 146.6        | 155.7        | 146.4        | 155.5        |

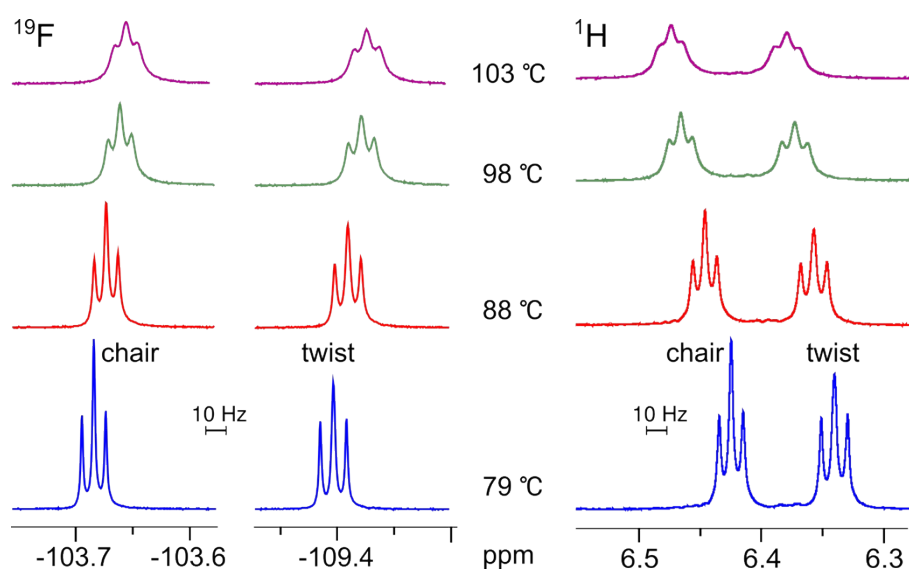

**Figure S4** Variable-temperature  $^1\text{H}$  and  $^{19}\text{F}$  NMR spectra of **1** in toluene solution.

The  $^{19}\text{F}\{^1\text{H}\}$  NMR spectrum of **17** consists of two symmetric doublet doublets at  $\delta$   $-99.7$  ppm and  $-104.9$  ppm (Figure S5) and resembles a typical first order spectrum of an  $\text{AA}'\text{XX}'$  spin system having coupling constants  $J_{\text{AX}} = J_{\text{A}'\text{X}'} = 8.7$  Hz and  $J_{\text{AX}'} = J_{\text{A}'\text{X}} = 7.1$  Hz. Taking into account the spin system symmetry, one should assign  $^5J_{\text{AX}}$  to the coupling between the  $^{19}\text{F}$  nuclei in the *para* positions to each other, while  $^7J_{\text{AX}'}$  to the coupling between the two  $^{19}\text{F}$  nuclei belonging to different aromatic rings. However, such a set of coupling constants, particularly the excessively large value of the long range  $^7J_{\text{AX}'}$ , would be hardly possible for fluoroarenes.<sup>S3,S4</sup> Therefore, the spectrum was analyzed as a second-order one using common analytical treatment for the  $\text{AA}'\text{XX}'$  spin system.<sup>S5</sup> After expanding the expressions for transition frequencies in Taylor series up to 2nd order and discarding small  $J_{\text{AA}'}$ ,  $J_{\text{AX}'}$  and  $J_{\text{A}'\text{X}}$  followed by simplifications, the approximation was obtained for the  $J_{\text{AX}}$  coupling constant as the distance

between the two outer components of the multiplet,  $J_{AX} = J_{A'X'} \sim 15.7$  Hz. Then from the distance between the two inner multiplet components, 1.6 Hz, which should be  $\sim J_{AX}^2/2J_{XX'}$ , the larger coupling constant  $J_{XX'} \sim 77$  Hz was estimated. Then, according to spin system treatment, a search was performed for the two much less intense transitions located at the distance of  $J_{XX'} \sim 77$  Hz to the left and right from the multiplet centre, with expected intensity  $\sim (J_{AX}/2J_{XX'})^2 \sim 1\%$  of the main multiplet components. Indeed, there are two very small peaks of approximately that intensity. With strict iterative numerical fitting procedure,<sup>S6</sup> the final spin system parameters were derived: coupling constant between the  $^{19}\text{F}$  nuclei in the *para* positions to each other  $J_{AX} = J_{A'X'} = 15.7$  Hz, and the large «through-space» coupling constant<sup>S7,S8</sup>  $J_{XX'} = 73.7$  Hz. These assignments are supported by XRD data and quantum chemical modeling, according to which the  $\text{F}_X$  and  $\text{F}_{X'}$  atoms are spatially close to each other (Figure S5).

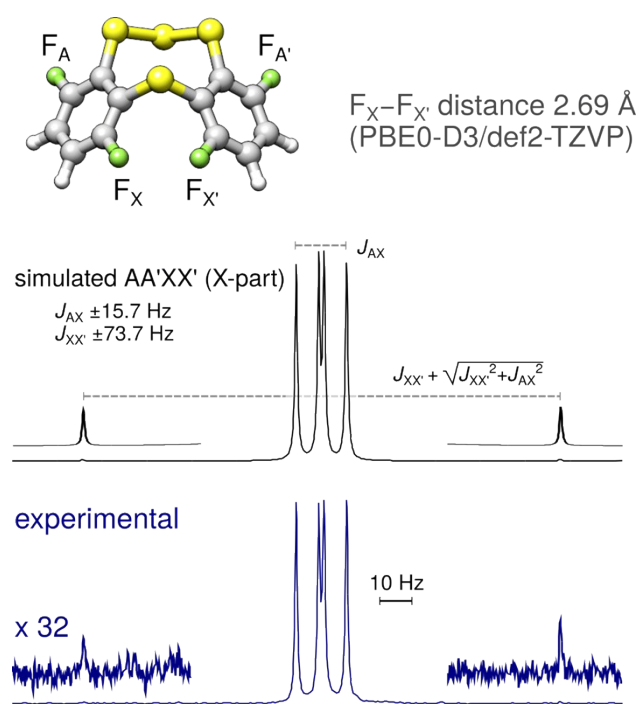

**Figure S5** Molecular geometry of **17**, together with its experimental and simulated  $^{19}\text{F}\{^1\text{H}\}$  NMR spectra (downfield multiplet,  $\delta -99.7$  ppm). The  $\text{F}_X\dots\text{F}_{X'}$  distance is  $\sim 0.2$  Å shorter than the sum of VdW radii. Colour code: C – grey, H – light grey, F – green, S – yellow.

## 2.2. UV-Vis spectra

According to the TD-DFT calculations, the *chair* conformation of **1** has more intensive absorption in the long-wave region; whereas the *twist* conformation, in the short-wave region. For **2** and **5**, the situation is similar though less pronounced (Figure S6).

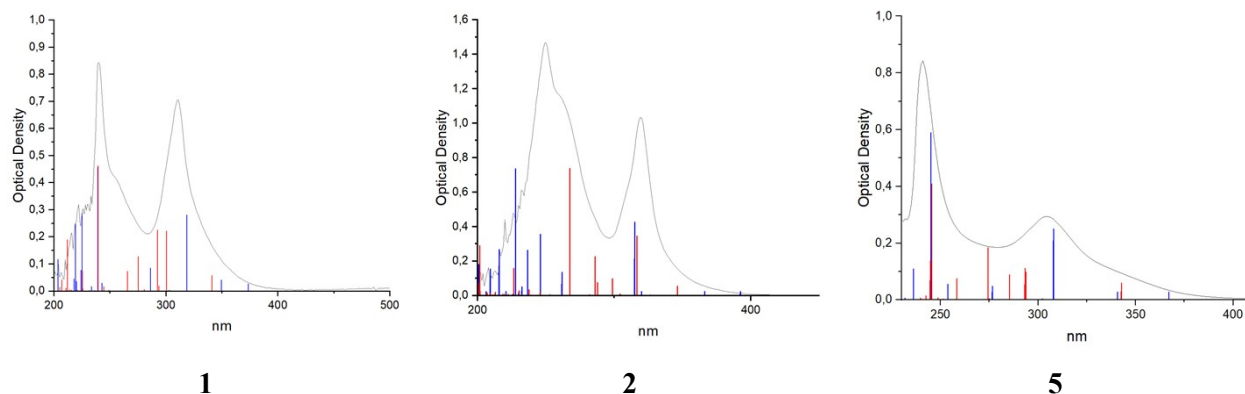

**Figure S6** Experimental UV-Vis spectra of **1**, **2** and **5** in chloroform solution (black lines) and positions and relative intensities of TD-B3LYP/def2-tzvpp calculated electronic transitions of the *chair* (blue bars) and *twist* (red bars) conformers.

### 2.3. IR spectra

The IR spectra of **1** and **2** were calculated at the B3LYP/DKH-def2-qzvpp level of theory; and the spectrum of **17**, at the PBE0/DKH-def2-qzvpp level of theory. The scaling factors were 0.948, 0.985, and 0.955, respectively (Figure S7).

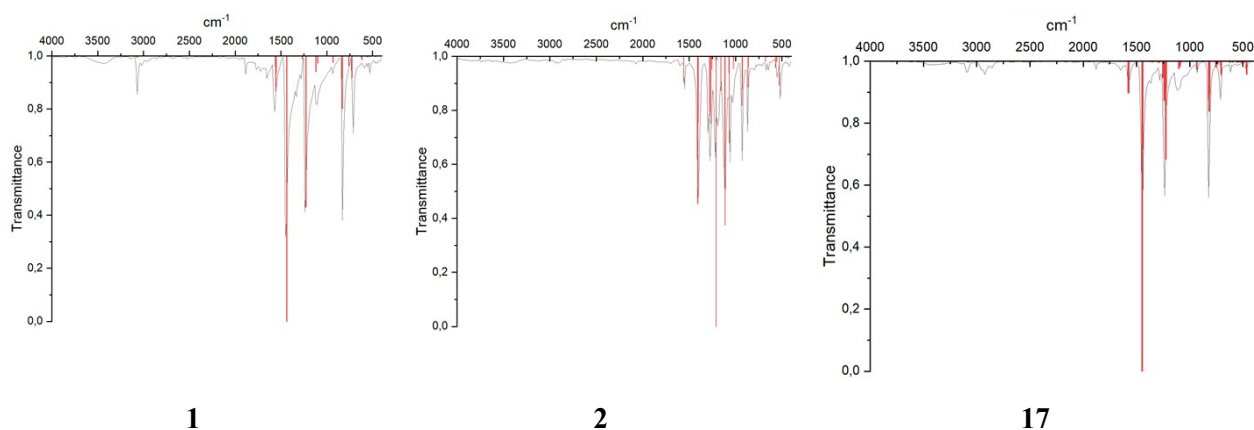

**Figure S7** Experimental in KBr pellets (black lines) and DFT-calculated (red bars) IR spectra of **1**, **2**, and **17**.

## 3. Quantum chemical calculations for conformational analysis

### 3.1. Selection of computational method

To study the PES, including Hessian calculations, the TS searches, and their connection to the minima via IRC, the well-established PBE/L1 method, the modern fast and accurate r<sup>2</sup>SCAN-3c method,<sup>S9</sup> and the standard DFT method PBE0-D3/def2-tzvp were employed. The first one is implemented in the *PRIRODA* program<sup>S10</sup> and two others in the *ORCA* program.<sup>S11</sup> Overall, the PBE/L1 method performed best matching experimental data (Table S7) with significantly lower computation times; calculation time for Hessian of **1** with PBE/L1+D3, r<sup>2</sup>SCAN-3c,<sup>S9</sup> and PBE0-D3/def2-tzvp was 1, 12, and 60 min, respectively.

**Table S7.** Comparison of DFT-calculated  $\Delta G$  with experimental  $\Delta G_0$  and  $\Delta G^\ddagger$ , kJ mol<sup>-1</sup>

| Object      | PBE/L1+D3 | PBE/L1+D3 <sup>a</sup> | r <sup>2</sup> SCAN-3c | r <sup>2</sup> SCAN-3c <sup>b</sup> | PBE0-D3/def2-tzvp | Exp. <sup>c</sup> |
|-------------|-----------|------------------------|------------------------|-------------------------------------|-------------------|-------------------|
| <b>1-tw</b> | 0         | –                      | –                      | –                                   | 0                 | 0                 |
| <b>1-ch</b> | 3.26      |                        |                        |                                     | 4.43              | –0.13             |
| <b>1-TS</b> | 89.33     |                        |                        |                                     | 95.18             | 88.2              |
| <b>2-tw</b> | 0         | 0                      | 0                      | 0                                   | 0                 | 0                 |
| <b>2-ch</b> | 7.94      | 10.87                  | 8.78                   | 8.78                                | 9.20              | 4.77              |
| <b>2-ts</b> | 61.45     | 79.84                  | 64.37                  | 56.4                                | 68.55             | 69.47             |
| <b>2-TS</b> | 94.47     | 99.07                  | 98.65                  | 102.0                               | 99.07             | 94.18             |
| <b>5-tw</b> | 0         | –                      | –                      | –                                   | 0                 | 0                 |
| <b>5-ch</b> | –5.64     |                        |                        |                                     | 4.18              | –5.73             |
| <b>5-TS</b> | 87.57     |                        |                        |                                     | 94.26             | 90.46             |
| RMS         | 3.68      | 7.48                   | 4.56                   | 9.07                                | 4.43              | –                 |

<sup>a</sup> Minenkov's solvation model<sup>S12</sup> was used for the *PRIRODA* program.<sup>S10</sup> <sup>b</sup> CPCM solvation method implemented in the *ORCA* program.<sup>S11</sup> <sup>c</sup> In toluene solution.

### 3.2. Analysis of IRC trajectories

An IRC trajectory connects the TS with the corresponding minima, *i.e.*, reactant and product, on the potential energy surface. Analysis of the energy profile of the IRC trajectory allows for the discovery of additional special points, known as inflection points, referred to as hidden intermediates and hidden transition states. The identification of such points is in scope of interest because, when reaction conditions change, or when transitioning to related substrates, the hidden intermediate may become a true local minimum.<sup>S13</sup>

Distinct inflection points are observed on the IRC trajectory of the interconversion of *twist* conformers of compound **2**, corresponding to pronounced minima on the IRC gradient curve (Figure S8). These points correspond to the geometries *hila* and *hilb* of the bent *twist* form. They are asymmetric, but if the non-planar state of the five-membered ring is not taken

into account, they have an effective  $C_2$  rotation axis oriented vertically as shown in Figure 4. Geometries *hi1a* and *hi1b* represent hidden intermediates. Their characteristic *twistboat* conformations is the global minimum for 1,5-cyclooctadiene.<sup>S14</sup>

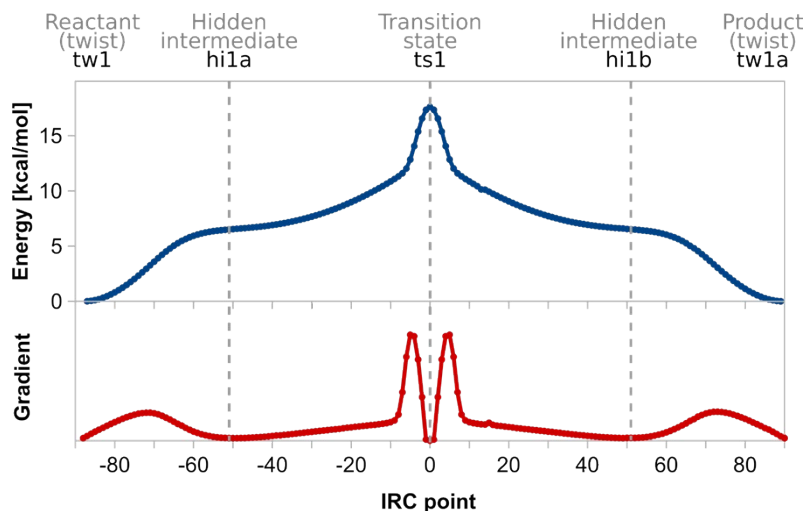

**Figure S8** IRC trajectory of *twist-twist* interconversion of compound **2**; IRC step,  $1.2 \text{ amu}^{1/2} \text{ \AA}$ .

Interestingly, the non-degenerate transformation *tw-ch* begins in the same path as the degenerate transformation *tw-tw* (Figures 4, S8). Both of these reactions pass through the same hidden intermediate *hi* with an effective  $C_2$  symmetry. The system then enters a bifurcation point, and the reaction path splits into two valleys. One leads to the *ts1* with an increased symmetry to  $C_{2v}$ , whilst the other leads to the *TS2* with reduced symmetry to  $C_1$ .

The path of the non-degenerate transformation in the reverse direction, from *ch* to *TS2*, also passes through an inflection point, corresponding to a minimum on the IRC gradient plot (Figure S9). This  $C_s$  structure *HI* represents another hidden stationary point and is characterized as a *half-chair*.<sup>S15</sup> For the archetypal tetrathiocine **3** at the MP2/6-31G\*<sup>S15</sup> and PBE/L1 levels of theory, a similar structure is a local minimum; whereas for compound **19** (for structure see Table S8), it represents the TS of the *chair*  $\rightarrow$  *twist* process and vice versa (PBE/L1 and PBE0-D3/def2-tzvp). In cases where it is a hidden intermediate, the path from *hi* to TS branches into two symmetric valleys. Depending on which of the dihedral angles C-S-S-C in *hi* is distorted, a specific enantiomer's TS is obtained.



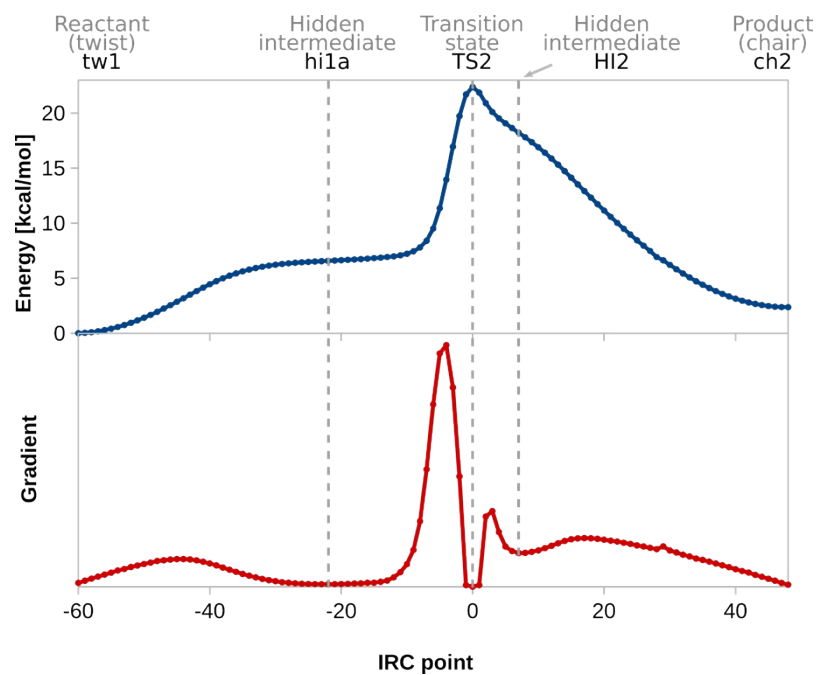

**Figure S9** IRC trajectory of *twist-chair* transformation of compound **2**, IRC step 1.2 amu<sup>1/2</sup> Å.

### 3.3. Other calculations

**Table S8.** Calculated  $\Delta G$  of the stationary points of compounds **1**, **4**, **5**, **18-20**, kcal mol<sup>-1</sup> <sup>a</sup>

| Stationary point     | PBE/L1 <sup>b</sup> | PBE0-D3/def2-tzvp |
|----------------------|---------------------|-------------------|
| <b>1</b> - <i>tw</i> | 0                   | 0                 |
| <b>1</b> - <i>ch</i> | 0.78                | 1.06              |
| <b>1</b> - <i>ts</i> | 13.74               | 15.61             |
| <b>1</b> -TS         | 21.37               | 22.77             |
| <b>4</b> - <i>tw</i> | 0                   | 0                 |
| <b>4</b> - <i>ch</i> | 0.84                | 0.86              |
| <b>4</b> - <i>ts</i> | 14.32               | 15.55             |
| <b>4</b> -TS         | 19.47               | 20.29             |
| <b>5</b> - <i>tw</i> | 0                   | 0                 |
| <b>5</b> - <i>ch</i> | -1.35               | -0.57             |
| <b>5</b> - <i>ts</i> | 11.52               | 13.75             |

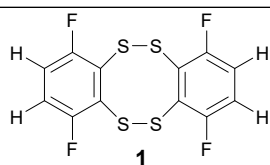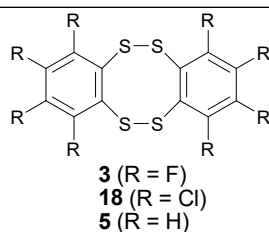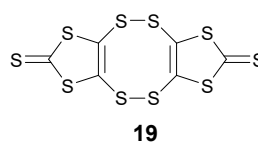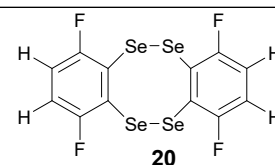

|              |       |       |
|--------------|-------|-------|
| <b>5-TS</b>  | 20.95 | 22.55 |
| <b>18-tw</b> | 0     | 0     |
| <b>18-ch</b> | 4.37  | 3.07  |
| <b>18-ts</b> | 15.45 | 15.63 |
| <b>18-TS</b> | 23.96 | 25.29 |
| <b>19-tw</b> | 0     | 0     |
| <b>19-ch</b> | -2.56 | -1.70 |
| <b>19-ts</b> | 6.91  | 10.02 |
| <b>19-TS</b> | 15.05 | 15.61 |
| <b>20-tw</b> | 0     | 0     |
| <b>20-ch</b> | -2.59 | -2.24 |
| <b>20-ts</b> | 8.89  | 9.22  |
| <b>20-TS</b> | 20.19 | 21.85 |

<sup>a</sup> Designations: *tw* – *twist* conformer, *ch* – *chair* conformer, *ts* – transition state of the racemization of *twist* conformer, TS – transition state of *twist* → *chair* transformation <sup>b</sup> With Grimme's D3 dispersion correction to optimized geometry.

## 4. Kinetics evaluation

### 4.1. Equilibrium *chair* ↔ *twist*

Equation  $\Delta G = -RT \ln K$  in the form  $y = x \cdot \Delta H + \Delta S$ ;  $K = \text{twist}/\text{chair}$ ,  $x = -1000/T$ ;  $y = R \cdot \ln(K)$ ,  $\Delta G = y/x$  (Tables S9-S13; calorie is used as energy unit).

**Table S9.** Compound **1** in toluene solution

| T     | K     | x      | y      | $\Delta G_0$ |
|-------|-------|--------|--------|--------------|
| 302.2 | 0.952 | -3.309 | -0.098 | 0.0295       |
| 301.5 | 0.949 | -3.317 | -0.105 | 0.0316       |
| 301.0 | 0.947 | -3.322 | -0.109 | 0.0328       |
| 295.1 | 0.936 | -3.389 | -0.131 | 0.0385       |
| 295.0 | 0.935 | -3.390 | -0.133 | 0.0393       |
| 313.4 | 0.974 | -3.191 | -0.053 | 0.0167       |
| 313.3 | 0.979 | -3.192 | -0.042 | 0.0133       |
| 323.0 | 0.982 | -3.096 | -0.036 | 0.0116       |
| 322.9 | 0.981 | -3.097 | -0.039 | 0.0126       |
| 332.6 | 0.991 | -3.007 | -0.019 | 0.0063       |

|       |       |        |        |        |
|-------|-------|--------|--------|--------|
| 332.6 | 0.978 | -3.007 | -0.045 | 0.0148 |
| 342.2 | 0.981 | -2.922 | -0.038 | 0.0131 |
| 342.3 | 0.963 | -2.921 | -0.076 | 0.0260 |
| 351.9 | 0.969 | -2.842 | -0.064 | 0.0224 |
| 351.9 | 0.956 | -2.842 | -0.089 | 0.0314 |
| 361.5 | 0.968 | -2.766 | -0.065 | 0.0236 |
| 361.5 | 0.947 | -2.766 | -0.108 | 0.0389 |
| 371.2 | 0.95  | -2.694 | -0.103 | 0.0381 |
| 376.0 | 0.95  | -2.660 | -0.102 | 0.0384 |
| 310.2 | 0.966 | -3.224 | -0.069 | 0.0215 |

---

**Table S10.** Compound **1** in chloroform solution

| T     | K    | x      | y     | $\Delta G_0$ |
|-------|------|--------|-------|--------------|
| 332.7 | 1.15 | -3.006 | 0.284 | -0.0946      |
| 322.9 | 1.20 | -3.097 | 0.361 | -0.1165      |
| 313.3 | 1.22 | -3.192 | 0.401 | -0.1257      |
| 300.9 | 1.26 | -3.323 | 0.452 | -0.1360      |
| 295.3 | 1.28 | -3.386 | 0.487 | -0.1438      |

---

**Table S11.** Compound **2**

| T     | K    | x      | y     | $\Delta G_0$ |
|-------|------|--------|-------|--------------|
| 296.9 | 6.88 | -3.368 | 3.833 | -1.1379      |
| 304.8 | 6.82 | -3.281 | 3.815 | -1.1629      |
| 313.5 | 6.64 | -3.190 | 3.762 | -1.1794      |
| 323.0 | 6.34 | -3.096 | 3.670 | -1.1855      |
| 332.7 | 6.20 | -3.006 | 3.626 | -1.2063      |
| 342.3 | 5.94 | -2.921 | 3.541 | -1.2120      |
| 351.9 | 5.74 | -2.842 | 3.473 | -1.2220      |
| 361.6 | 5.48 | -2.765 | 3.380 | -1.2224      |
| 371.3 | 5.24 | -2.693 | 3.291 | -1.2221      |
| 376.0 | 5.13 | -2.660 | 3.249 | -1.2217      |
| 380.8 | 5.06 | -2.626 | 3.222 | -1.2269      |
| 295.6 | 6.88 | -3.383 | 3.834 | -1.1333      |
| 332.6 | 6.19 | -3.007 | 3.623 | -1.2050      |
| 342.2 | 5.99 | -2.922 | 3.558 | -1.2176      |
| 351.9 | 5.76 | -2.842 | 3.480 | -1.2245      |
| 361.5 | 5.52 | -2.766 | 3.393 | -1.2267      |
| 371.2 | 5.26 | -2.694 | 3.301 | -1.2252      |
| 376.0 | 5.17 | -2.660 | 3.264 | -1.2274      |

|       |      |        |       |         |
|-------|------|--------|-------|---------|
| 322.7 | 6.60 | -3.099 | 3.750 | -1.2102 |
| 304.2 | 6.78 | -3.287 | 3.803 | -1.1569 |

---

**Table S12.** Compound **5**<sup>S2</sup>

---

| T     | K     | x      | y     | $\Delta G_0$ |
|-------|-------|--------|-------|--------------|
| 300.0 | 0.100 | -3.333 | -4.58 | 1.373        |
| 310.0 | 0.117 | -3.226 | -4.26 | 1.322        |
| 320.0 | 0.123 | -3.125 | -4.16 | 1.333        |
| 330.0 | 0.153 | -3.030 | -3.73 | 1.231        |
| 340.0 | 0.157 | -2.941 | -3.68 | 1.251        |
| 350.0 | 0.181 | -2.857 | -3.40 | 1.189        |
| 360.0 | 0.201 | -2.778 | -3.19 | 1.148        |
| 370.0 | 0.215 | -2.703 | -3.05 | 1.130        |
| 380.0 | 0.226 | -2.632 | -2.96 | 1.123        |

---

**Table S13.** Compound **5**, this work

---

| T     | K     | x      | y     | $\Delta G_0$ |
|-------|-------|--------|-------|--------------|
| 296.3 | 0.107 | -3.375 | -4.45 | 1.3174       |
| 313.4 | 0.123 | -3.191 | -4.16 | 1.3043       |
| 323.0 | 0.14  | -3.096 | -3.91 | 1.2635       |
| 332.6 | 0.148 | -3.007 | -3.79 | 1.2615       |
| 342.3 | 0.16  | -2.921 | -3.65 | 1.2486       |
| 351.9 | 0.173 | -2.842 | -3.49 | 1.2286       |
| 361.6 | 0.179 | -2.765 | -3.41 | 1.2346       |
| 371.2 | 0.184 | -2.694 | -3.36 | 1.2469       |
| 376.0 | 0.188 | -2.660 | -3.32 | 1.2486       |
| 307.2 | 0.125 | -3.255 | -4.13 | 1.2697       |

---

Compound **1** in toluene:  $\Delta H_0 = 0.1 \pm 0.14$  kJ mol<sup>-1</sup>,  $\Delta S_0 = 0.04 \pm 0.4$  J K<sup>-1</sup> mol<sup>-1</sup>,  $r = 0.200$ .

Compound **1** in chloroform:  $\Delta H_0 = -2.1 \pm 0.2$  kJ mol<sup>-1</sup>,  $\Delta S_0 = -5.0 \pm 0.6$  J K<sup>-1</sup> mol<sup>-1</sup>,  $r = -0.988$ .

Compound **2**:  $\Delta H_0 = -3.53 \pm 0.15$  kJ mol<sup>-1</sup>,  $4.4 \pm 0.5$  J K<sup>-1</sup> mol<sup>-1</sup>,  $r = 0.983$ .

Compound **5**<sup>S2</sup>:  $\Delta H_0 = 9.9 \pm 0.4$  kJ mol<sup>-1</sup>,  $\Delta S_0 = 14 \pm 1$  J K<sup>-1</sup> mol<sup>-1</sup>,  $r = 0.994$ .

Compound **5**, this work:  $\Delta H_0 = 6.5 \pm 0.3$  kJ mol<sup>-1</sup>,  $\Delta S_0 = 3.8 \pm 0.9$  J K<sup>-1</sup> mol<sup>-1</sup>,  $r = 0.9915$ .

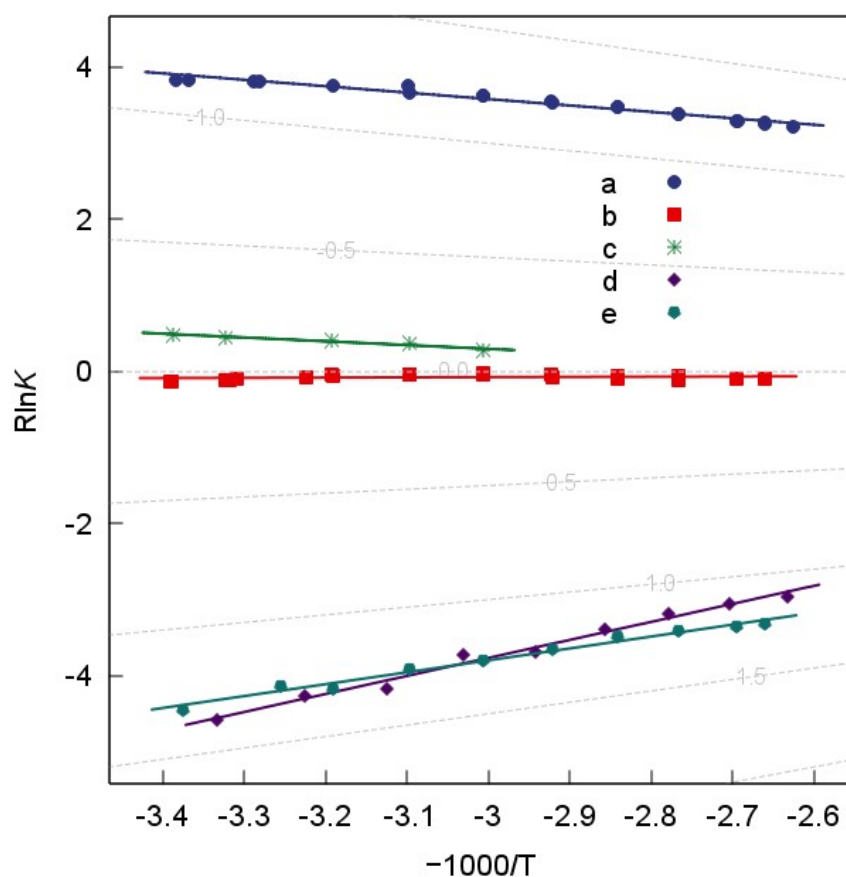

**Figure S10** Temperature dependence of the conformational equilibrium constants for **1** (*b*: in toluene, red squares; *c*: in chloroform solution, green stars), **2** (*a*: blue circles), and **5** (*d*: purple diamonds;<sup>S2</sup> *e*: blue-green pentagons, this work); dashed lines are  $\Delta G$  isolines.

#### 4.2 *Twist* $\rightarrow$ *twist* and *chair* $\rightarrow$ *twist* kinetics

Eyring equation in the form  $y = x \cdot \Delta H + \Delta S$ ;  $x = -1000/T$ ,  $y = R \cdot (\ln(k/T) - 23.76)$ ,  $\Delta G = y/x$  (Tables S14-S18; calorie is used as energy unit).

**Table S14.** Compound **1** in toluene, *chair*  $\rightarrow$  *twist*

| T     | k     | x      | y     | $\Delta G^\ddagger$ |
|-------|-------|--------|-------|---------------------|
| 313.3 | 0.015 | -3.192 | -67.0 | 20.986              |
| 322.9 | 0.054 | -3.097 | -64.5 | 20.826              |
| 332.6 | 0.175 | -3.007 | -62.2 | 20.694              |

|       |       |        |       |        |
|-------|-------|--------|-------|--------|
| 342.2 | 0.529 | -2.922 | -60.1 | 20.559 |
| 351.9 | 1.45  | -2.842 | -58.1 | 20.456 |
| 361.5 | 3.72  | -2.766 | -56.3 | 20.356 |
| 371.2 | 8.93  | -2.694 | -54.6 | 20.276 |
| 376.0 | 12.4  | -2.660 | -54.0 | 20.305 |
| 376.0 | 15.3  | -2.660 | -53.6 | 20.146 |
| 371.2 | 10.5  | -2.694 | -54.3 | 20.157 |
| 361.5 | 3.53  | -2.766 | -56.4 | 20.394 |

---

**Table S15.** Compound **1** in CDCl<sub>3</sub>, *chair* → *twist*

| T     | k     | x      | y      | ΔG <sup>#</sup> |
|-------|-------|--------|--------|-----------------|
| 332.7 | 0.18  | -3.006 | -62.16 | 20.682          |
| 322.9 | 0.04  | -3.097 | -65.09 | 21.019          |
| 313.2 | 0.008 | -3.193 | -68.23 | 21.370          |

---

**Table S16.** Compound **2**, *twist* → *twist*

| T     | k    | x      | y     | ΔG <sup>#</sup> |
|-------|------|--------|-------|-----------------|
| 304.8 | 8.6  | -3.281 | -54.3 | 16.55           |
| 323.0 | 79   | -3.096 | -50.0 | 16.15           |
| 332.7 | 178  | -3.006 | -48.5 | 16.12           |
| 342.3 | 418  | -2.921 | -46.8 | 16.03           |
| 351.9 | 961  | -2.842 | -45.2 | 15.91           |
| 361.6 | 2280 | -2.765 | -43.6 | 15.75           |
| 371.3 | 4810 | -2.693 | -42.1 | 15.64           |
| 376.0 | 6550 | -2.660 | -41.5 | 15.62           |
| 380.8 | 8920 | -2.626 | -40.9 | 15.59           |
| 304.8 | 6.9  | -3.281 | -54.7 | 16.69           |
| 313.5 | 22   | -3.190 | -52.5 | 16.46           |
| 323.0 | 78.5 | -3.096 | -50.0 | 16.16           |
| 332.7 | 194  | -3.006 | -48.3 | 16.07           |

---

**Table S17.** Compound **2**, *chair* → *twist*

| T     | k     | x      | y      | $\Delta G^\ddagger$ |
|-------|-------|--------|--------|---------------------|
| 371.3 | 5.1   | -2.693 | -55.74 | 20.695              |
| 376.0 | 8.85  | -2.660 | -54.67 | 20.555              |
| 376.0 | 9.14  | -2.660 | -54.60 | 20.530              |
| 376.0 | 8.08  | -2.660 | -54.85 | 20.623              |
| 376.0 | 7.1   | -2.660 | -55.10 | 20.719              |
| 380.8 | 10.1  | -2.626 | -54.43 | 20.727              |
| 332.5 | 0.096 | -3.008 | -63.41 | 21.084              |
| 342.3 | 0.3   | -2.921 | -61.21 | 20.951              |
| 351.9 | 0.84  | -2.842 | -59.21 | 20.837              |
| 361.5 | 2.25  | -2.766 | -57.31 | 20.717              |
| 371.2 | 5.84  | -2.694 | -55.47 | 20.589              |
| 376.0 | 8.24  | -2.660 | -54.81 | 20.608              |

**Table S18.** Compound **5**, *chair* → *twist*

| T     | k      | x      | y      | $\Delta G^\ddagger$ |
|-------|--------|--------|--------|---------------------|
| 332.7 | 0.0072 | -3.006 | -68.56 | 22.810              |
| 342.2 | 0.0196 | -2.922 | -66.63 | 22.799              |
| 351.9 | 0.0584 | -2.842 | -64.51 | 22.702              |
| 361.6 | 0.147  | -2.765 | -62.73 | 22.682              |
| 371.2 | 0.352  | -2.694 | -61.05 | 22.661              |
| 376.0 | 0.531  | -2.660 | -60.26 | 22.656              |

Compound **1** in toluene, *chair* → *twist*:  $\Delta H^\ddagger = 103.5 \pm 1.1$  kJ mol<sup>-1</sup>,  $\Delta S^\ddagger = 51 \pm 3$  J K<sup>-1</sup> mol<sup>-1</sup>,  $r = 0.999$ .

Compound **1** in CDCl<sub>3</sub>, *chair* → *twist*:  $\Delta H^\ddagger = 135.6 \pm 0.7$  kJ mol<sup>-1</sup>,  $\Delta S^\ddagger = 148 \pm 2$  J K<sup>-1</sup> mol<sup>-1</sup>,  $r = 0.999986$ .

Compound **2**, *twist* → *twist*:  $\Delta H^\ddagger = 86.2 \pm 1.4$  kJ mol<sup>-1</sup>,  $\Delta S^\ddagger = 56 \pm 4$  J K<sup>-1</sup> mol<sup>-1</sup>,  $r = 0.999$ .

Compound **2**, *chair* → *twist*:  $\Delta H^\ddagger = 101.6 \pm 2.1$  kJ mol<sup>-1</sup>,  $\Delta S^\ddagger = 41 \pm 6$  J K<sup>-1</sup> mol<sup>-1</sup>,  $r = 0.998$ .

Compound **5**, *chair* → *twist*:  $\Delta H^\ddagger = 101 \pm 1$  kJ mol<sup>-1</sup>,  $\Delta S^\ddagger = 17 \pm 3$  J K<sup>-1</sup> mol<sup>-1</sup>,  $r = 0.99983$ .

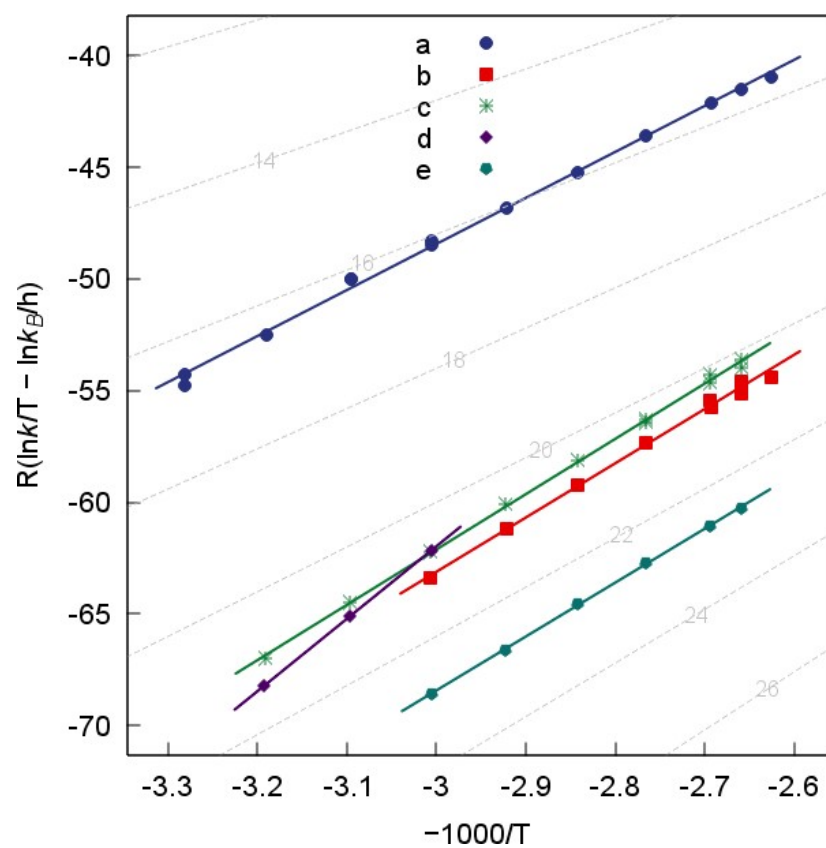

**Figure S11** Temperature dependence of the rates of transitions *chair*  $\rightarrow$  *twist* for **1** (*c*: green stars; *d*: in chloroform solution, purple diamonds), **2** (*b*: red squares), and **5** (*e*: blue-green pentagons), and *twist*  $\rightarrow$  *twist* for **2** (*a*: blue circles); dashed lines are  $\Delta G^\ddagger$  isolines.



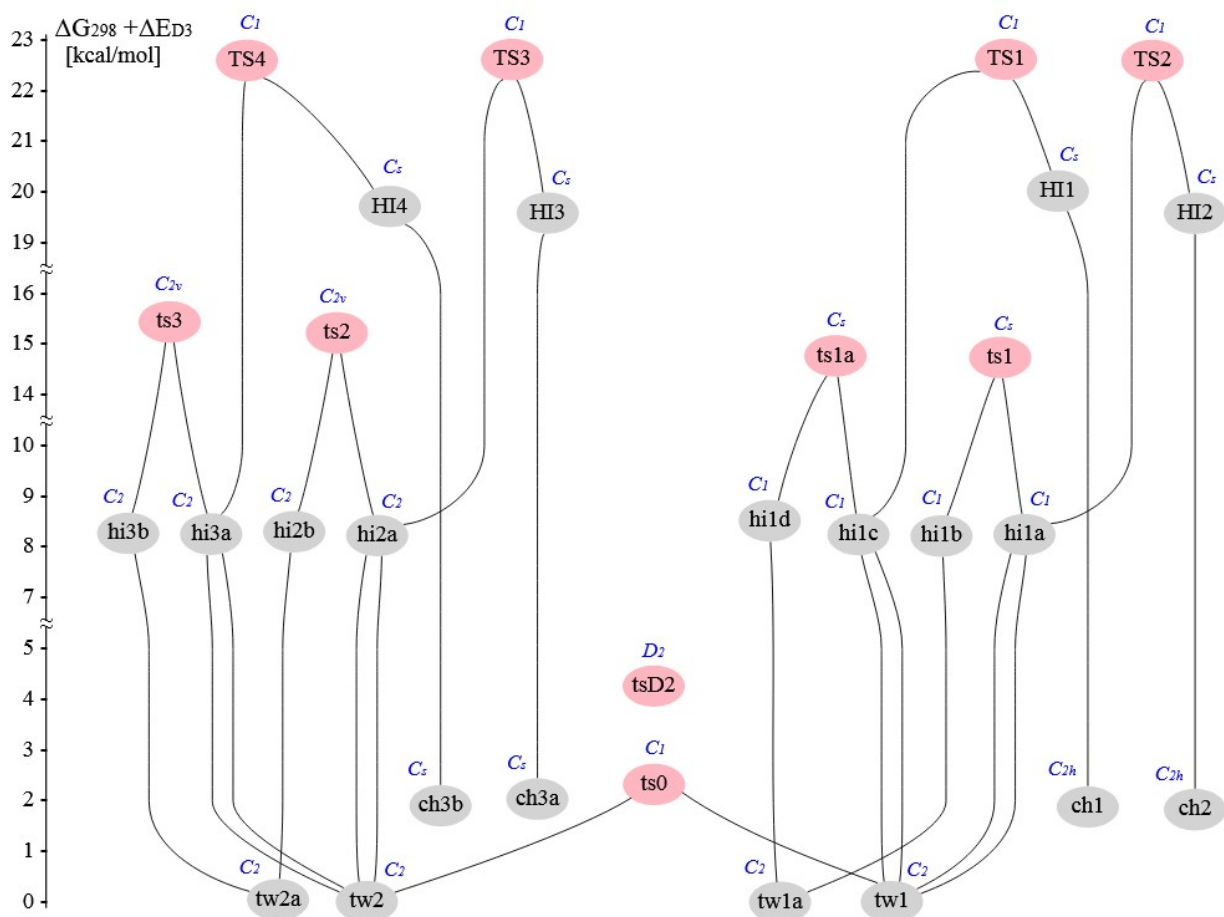

**Figure S12** Energy diagram for stable conformations, transition states and intermediates for **2**. 3D visualization and xyz-coordinates of all structures are available at the website <http://limor1.nioch.nsc.ru/quant/Makarov/tetrathiocin/>

## 5. References

- S1 E. J. Yearley, E. L. Lippert, D. J. Mitchell and A. A. Pinkerton, *Acta Crystallogr. C*, 2007, **63**, o576–o577
- S2 T. Chivers, M. Parvez, I. Vargas-Baca and G. Schatte, *Can. J. Chem.*, 1998, **76**, 1093–1101.
- S3 W. R. Dolbier, in: *Guide to Fluorine NMR for Organic Chemists*, Wiley, 2009.
- S4 S. A. Ukhanev, S. V. Fedorov, Yu. Yu. Rusakov, I. L. Rusakova and L. B. Krivdin, *J. Fluor. Chem.*, 2023, **266**, 110093.

- S5 J. W. Emsley, J. Feeney and L. H. Sutcliffe, *High Resolution Nuclear Magnetic Resonance Spectroscopy*, Vol. 1, Pergamon Press, 1965.
- S6 D. A. Cheshkov, K. F. Sheberstov, D. O. Sinitsyn and V. A. Chertkov, *Magn. Reson. Chem.*, 2018, **56**, 449–457.
- S7 W. D. Arnold, J. Mao, H. Sun and E. Oldfield, *J. Am. Chem. Soc.*, 2000, **122**, 12164–12168.
- S8 J.-C. Hierso, *Chem. Rev.*, 2014, **114**, 4838–4867.
- S9 J. W. Furness, A. D. Kaplan, J. Ning, J. P. Perdew and J. Sun, *J. Phys. Chem. Lett.*, 2020, **110**, 8208–8215.
- S10 D. N. Laikov and Yu. A. Ustynyuk, *Russ. Chem. Bull.*, 2005, **54**, 820–826.
- S11 F. Neese, *WIREs Comput. Mol. Sci.*, 2022, **120**, e1606.
- S12 Y. Minenkov, *J. Chem. Theory Comput.*, 2023, **19**, 5221–5230.
- S13 E. Kraka and D. Cremer, *Acc. Chem. Res.*, 2010, **43**, 591–601.
- S14 W. R. Rocha and W. B. De Almeida, *J. Comput. Chem.*, 1997, **18**, 254–259.
- S15 T. Shimizu, K. Iwata, N. Kamigata and S. Ikuta, *J. Chem. Res.*, 1997, 38–39.
